# Supplementary material for: Interface-engineered hybrid electrocatalysts of Ti@holey-TiN/layered-double-hydroxides for efficient seawater electrolysis
Source: Royal Society of Chemistry journal article supplement (doi:10.1039/d4ta02886d), 2024-01-01
Supplement: d4ta02886d1.pdf [file d4ta02886d1.pdf]

## Supplementary information

for

### **Interface-engineered hybrid electrocatalysts of Ti@holey-TiN/layered-double-hydroxides for efficient seawater electrolysis**

Woosik Yoon,<sup>a,‡</sup> Yeon Hu Park,<sup>a,‡</sup> Xiaoyan Jin,<sup>b,\*</sup> and Seong-Ju Hwang<sup>a,\*</sup>

<sup>a</sup> Department of Materials Science and Engineering, Yonsei University, Seoul 03722, Republic of Korea.

<sup>b</sup> Department of Applied Chemistry, College of Natural Sciences, University of Seoul, Seoul 02504, Republic of Korea.

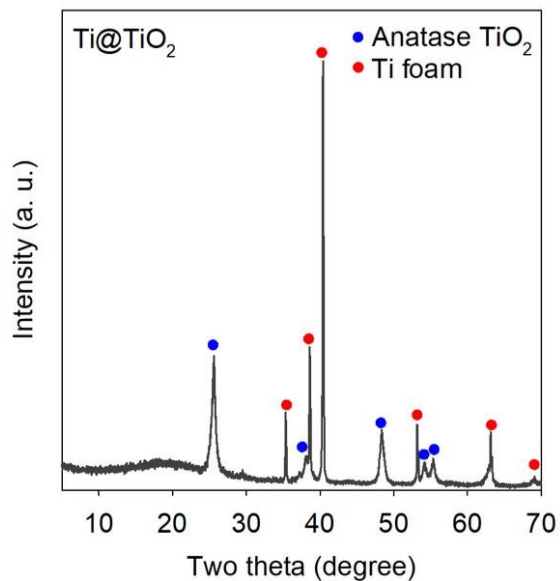

**Fig. S1.** Powder X-ray diffraction (XRD) patterns of Ti@TiO<sub>2</sub> material.

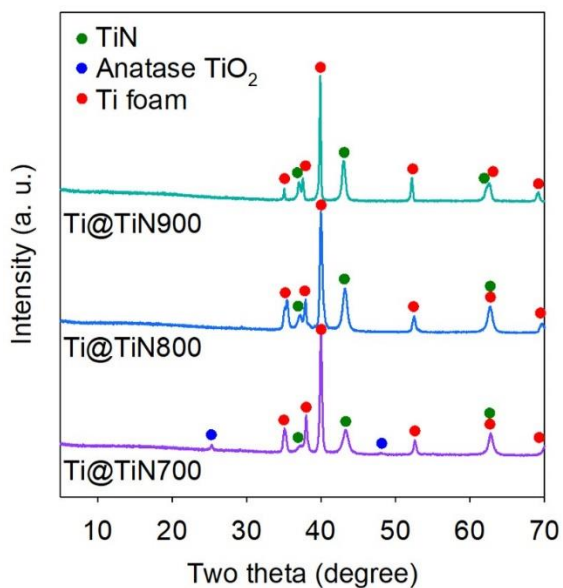

**Fig. S2.** Powder XRD patterns of Ti@TiN700–900 materials.

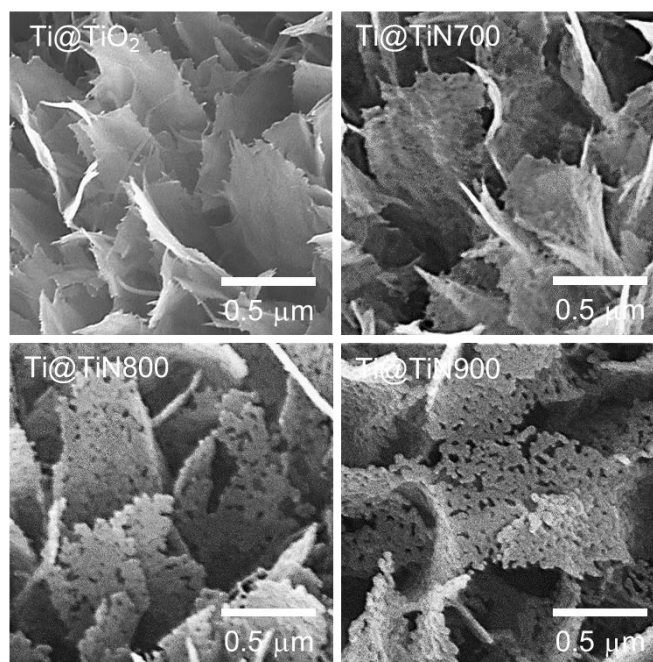

**Fig. S3.** Field emission-scanning electron microscopy (FE-SEM) images of Ti@TiO<sub>2</sub> and Ti@TiN700–900 materials.

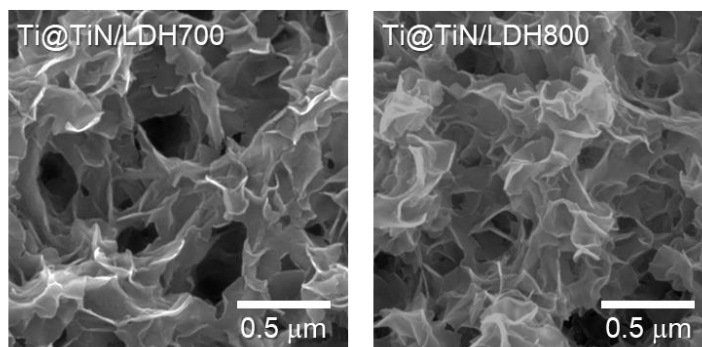

**Fig. S4.** FE-SEM images of Ti@TiN/LDH700 and Ti@TiN/LDH800 materials.

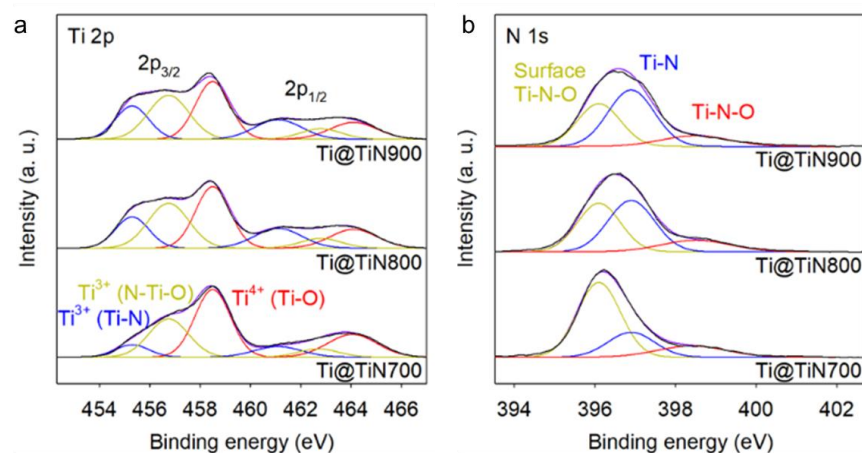

**Fig. S5.** (a) Ti 2p X-ray photoelectron spectroscopy (XPS) data and (b) N 1s XPS data of Ti@TiN700–900 materials.

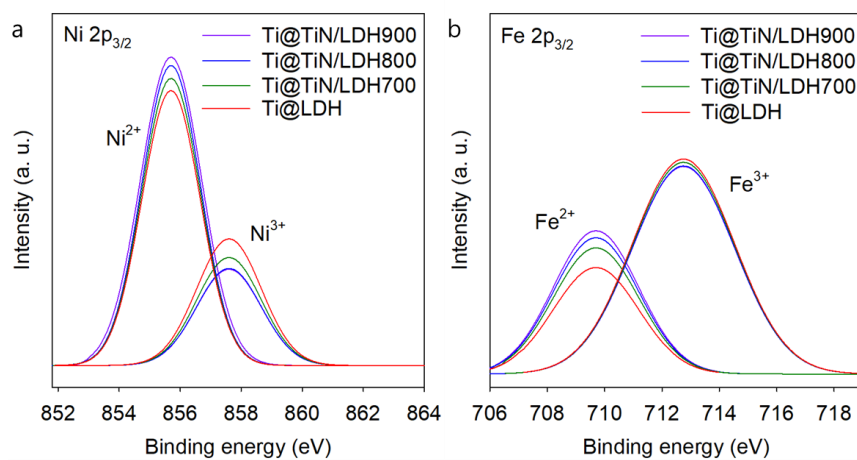

**Fig. S6.** (a) Overlapped XPS data of deconvoluted Ni 2p peaks and (b) Fe 2p peaks of Ti@LDH and Ti@TiN700–900 materials.

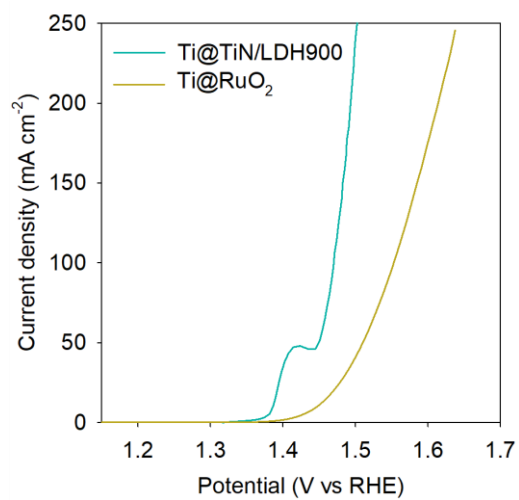

**Fig. S7.** Linear sweep voltammetry (LSV) data of Ti@TiN/LDH900 and Ti@RuO<sub>2</sub>.

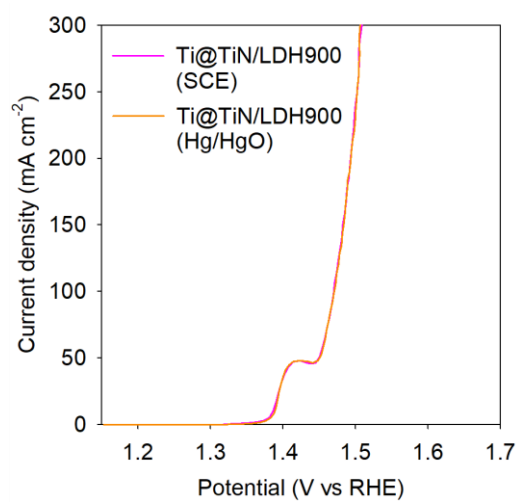

**Fig. S8.** LSV data of Ti@TiN/LDH900 measured using the SCE and Hg/HgO reference electrodes.

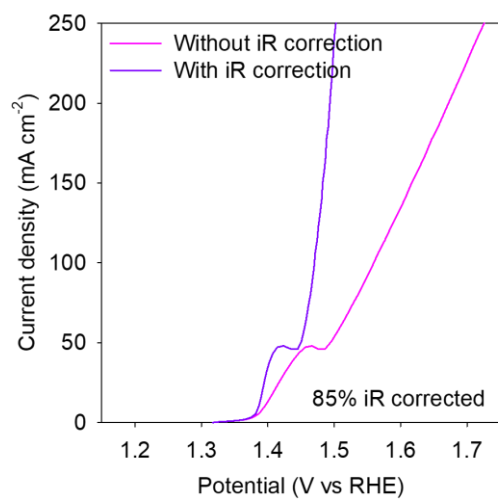

**Fig. S9.** LSV data of Ti@TiN/LDH900 without and with *iR* correction.

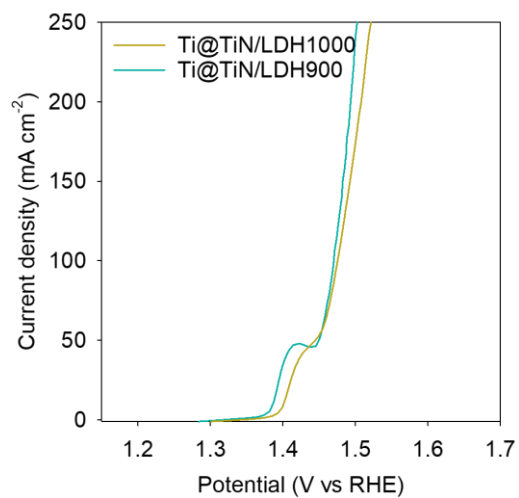

**Fig. S10.** LSV data of Ti@TiN/LDH900 and Ti@TiN/LDH1000 (synthesis of Ti@TiN/LDH at 1000 °C).

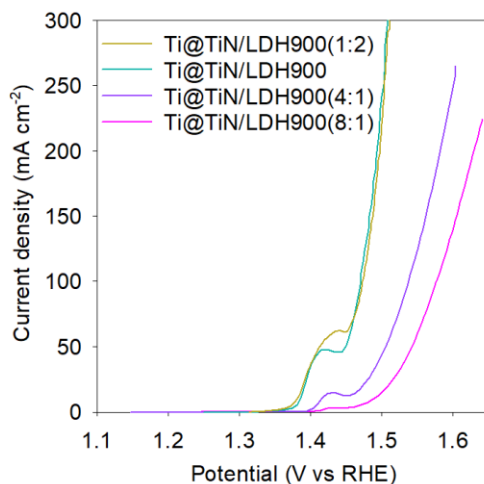

**Fig. S11.** LSV data of Ti@TiN/LDH900 nanohybrids with different TiN/LDH ratios (x:y).

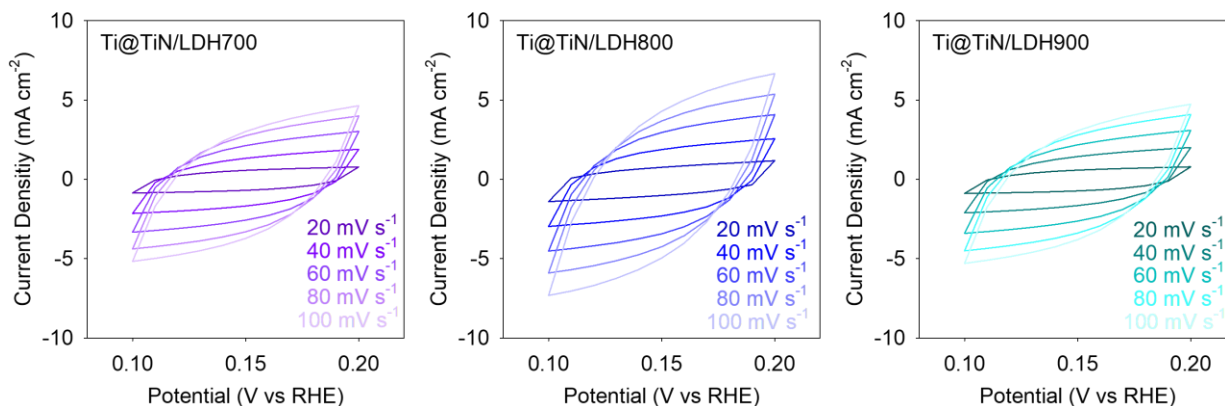

**Fig. S12.** Cyclic voltammetry (CV) curves of Ti@TiN/LDH700–900 materials measured at various scan rates.

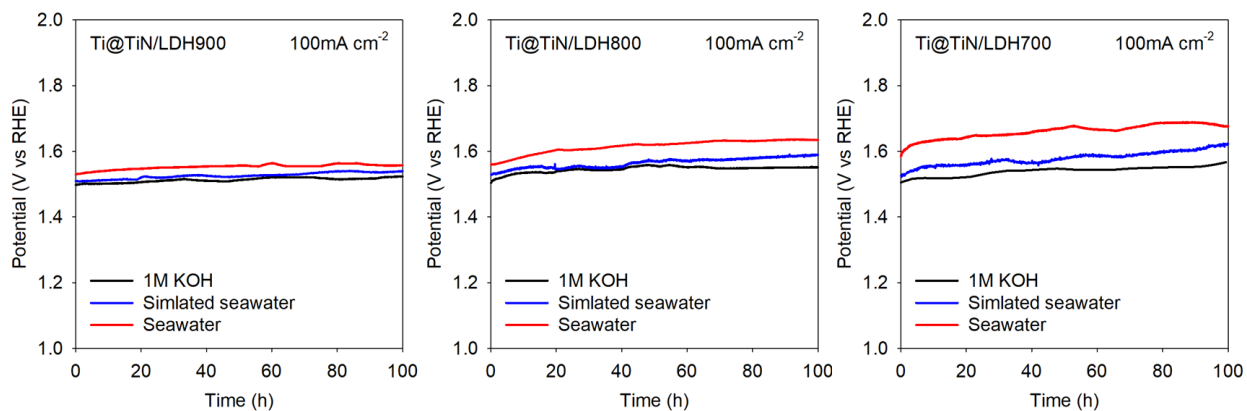

**Fig. S13.** Durability data of Ti@TiN/LDH900, Ti@TiN/LDH800 and Ti@TiN/LDH700 measured at 1 M KOH, simulated seawater and real seawater electrolytes.

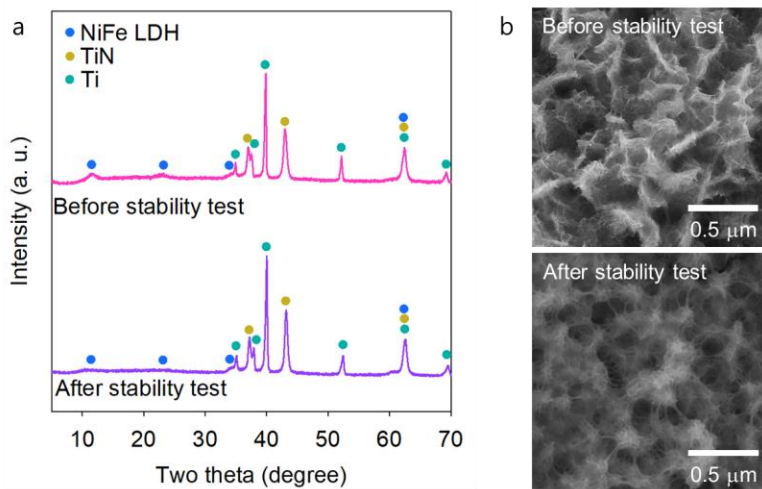

**Fig. S14.** (a) Powder XRD and (b) FE-SEM data of Ti@TiN/LDH900 before and after stability test.



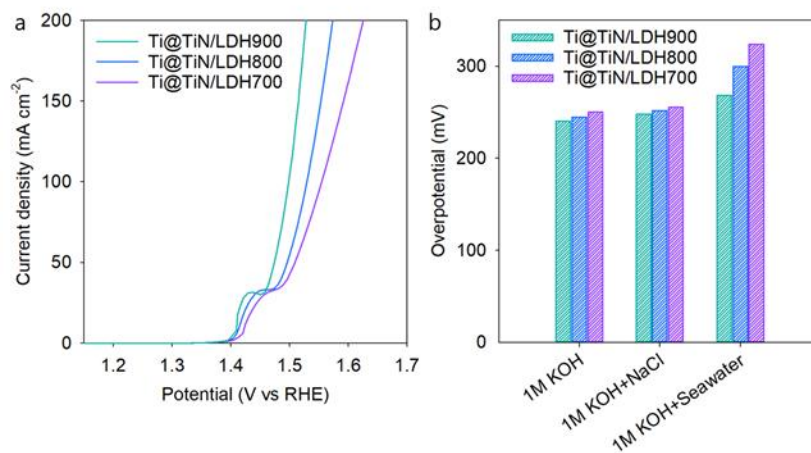

**Fig. S15.** (a) LSV of OER, and (b) overpotentials of Ti@TiN/LDH700, Ti@TiN/LDH800 and Ti@TiN/LDH900 measured at seawater electrolyte.

**Table S1.** Energy dispersive spectroscopy (EDS) data of Ti@TiN/LDH900 nanohybrids with different TiN/LDH ratios.

| Material      | molar ratio<br>(Ni-Fe-LDH/TiN) |
|---------------|--------------------------------|
| Ti@TiN/LDH900 | 2.03/1                         |

**Table S2.** Relative concentrations of Ni<sup>2+</sup>/Ni<sup>3+</sup> and Fe<sup>2+</sup>/Fe<sup>3+</sup> in Ti@TiN/LDH materials.

| Material      | Ni <sup>2+</sup> /Ni <sup>3+</sup> | Fe <sup>2+</sup> /Fe <sup>3+</sup> |
|---------------|------------------------------------|------------------------------------|
| Ti@LDH        | 2.442                              | 0.569                              |
| Ti@TiN/LDH700 | 2.720                              | 0.613                              |
| Ti@TiN/LDH800 | 2.954                              | 0.665                              |
| Ti@TiN/LDH900 | 3.066                              | 0.681                              |

**Table S3.** Results of non-linear least-squares Ni/Fe K-edge EXAFS fitting analysis.

| Material      | Bonding pair | Coordination number | Bond distance (Å) | $\Delta E$ (eV) | $\sigma^2$ (Å <sup>2</sup> ) |
|---------------|--------------|---------------------|-------------------|-----------------|------------------------------|
| Ti@TiN/LDH700 | Ni–O         | 6                   | 2.038             | 2.51            | 0.0039                       |
|               | Fe–O         | 6                   | 1.973             | 0.94            | 0.0053                       |
| Ti@TiN/LDH800 | Ni–O         | 6                   | 2.039             | 2.43            | 0.0040                       |
|               | Fe–O         | 6                   | 1.975             | 0.10            | 0.0043                       |
| Ti@TiN/LDH900 | Ni–O         | 6                   | 2.040             | 1.77            | 0.0044                       |
|               | Fe–O         | 6                   | 1.984             | 1.03            | 0.0083                       |
| Ni–Fe-LDH     | Ni–O         | 6                   | 2.023             | –3.64           | 0.0058                       |
|               | Fe–O         | 6                   | 1.968             | –5.14           | 0.0079                       |

**Table S4.** Comparison of OER activity for Ti@TiN/LDH in 1 M KOH and real seawater electrolytes with recently reported OER electrocatalysts.

| Catalyst                                            | Support | Electrolyte        | Overpotential @ 100<br>mV @ mA cm <sup>-2</sup> | Reference                                             |
|-----------------------------------------------------|---------|--------------------|-------------------------------------------------|-------------------------------------------------------|
| Ti@TiN/NiFe<br>LDH                                  | Ti foam | 1 M KOH            | 240                                             | This Work                                             |
|                                                     |         | 1 M KOH + Seawater | 268                                             |                                                       |
| NiFe LDH@<br>FeNi <sub>2</sub> S <sub>4</sub>       | Ni foam | 1 M KOH            | 240                                             | <i>Adv. Funct. Mater.</i> , 2022, <b>32</b> , 2200951 |
|                                                     |         | 1 M KOH + Seawater | 271                                             |                                                       |
| N-CDs/NiFe<br>LDH                                   | Ni foam | 1 M KOH            | 260                                             | <i>Nano Res.</i> , 2022, <b>15</b> , 7063–7070        |
|                                                     |         | 1 M KOH + Seawater | 340                                             |                                                       |
| BZ-NiFe LDH                                         | Carbon  | 1 M KOH            | 230                                             | <i>Nano Res. Energy</i> , 2022, <b>1</b> , 9120028    |
|                                                     | cloth   | 1 M KOH + Seawater | 300                                             |                                                       |
| CoP <sub>x</sub> @FeOOH                             | Ni foam | 1 M KOH            | 254                                             | <i>Appl. Catal., B</i> , 2021, <b>294</b> , 120256    |
|                                                     |         | 1 M KOH + Seawater | 283                                             |                                                       |
| NiCoS                                               | Ni foam | 1 M KOH            | 270                                             | <i>Appl. Catal., B</i> , 2021, <b>291</b> , 120071    |
|                                                     |         | 1 M KOH + Seawater | 360                                             |                                                       |
| Mo–Ni <sub>3</sub> S <sub>2</sub>                   | Ni foam | 1 M KOH            | 280                                             | <i>Energy Fuels</i> , 2022, <b>36</b> , 2910–2917     |
|                                                     |         | 1 M KOH + Seawater | 291                                             |                                                       |
| Ni <sub>3</sub> S <sub>2</sub> @Fe-NiP <sub>x</sub> | Ni foam | 1 M KOH            | 240                                             | <i>Adv. Sci.</i> , 2022, <b>9</b> , 2104846           |
|                                                     |         | 1 M KOH + Seawater | 290                                             |                                                       |
| Ni <sub>2</sub> P-Fe <sub>2</sub> P                 | Ni foam | 1 M KOH            | 261                                             | <i>Adv. Funct. Mater.</i> , 2021, <b>31</b> , 2006484 |
|                                                     |         | 1 M KOH + Seawater | 305                                             |                                                       |
| S,P-(Ni,Mo,Fe)<br>NiMoP                             | Wood    | 1 M KOH            | 279                                             | <i>Appl. Catal., B</i> , 2021, <b>293</b> , 120215    |
|                                                     | aerogel | 1 M KOH + Seawater | 286                                             |                                                       |
| 1D-Cu@Co-<br>CoO/Rh                                 | Cu foam | 1 M KOH            | 380                                             | <i>Small</i> , 2021, <b>17</b> , 2103826              |
|                                                     |         | 1 M KOH + Seawater | 400                                             |                                                       |

**Table S5.** Charge transfer resistance ( $R_{ct}$ ) values calculated from electrochemical impedance spectroscopy (EIS) fitting analysis.

| Material      | $R_{ct}$ ( $\Omega$ ) |
|---------------|-----------------------|
| Ti@TiN        | 36.7                  |
| Ti@LDH        | 152.6                 |
| Ti@TiN/LDH700 | 2.5                   |
| Ti@TiN/LDH800 | 2.3                   |
| Ti@TiN/LDH900 | 1.5                   |
